# Supplementary material for: PPA1 regulates tumor malignant potential and clinical outcome of colon adenocarcinoma through JNK pathways
Source: PubMed Central journal article supplement (PMC5601679; doi:10.18632/oncotarget.17381), 2017-04-24
Supplement: oncotarget-08-58611-s001.pdf [file oncotarget-08-58611-s001.pdf]

# PPA1 regulates tumor malignant potential and clinical outcome of colon adenocarcinoma through JNK pathways

## SUPPLEMENTARY FIGURES

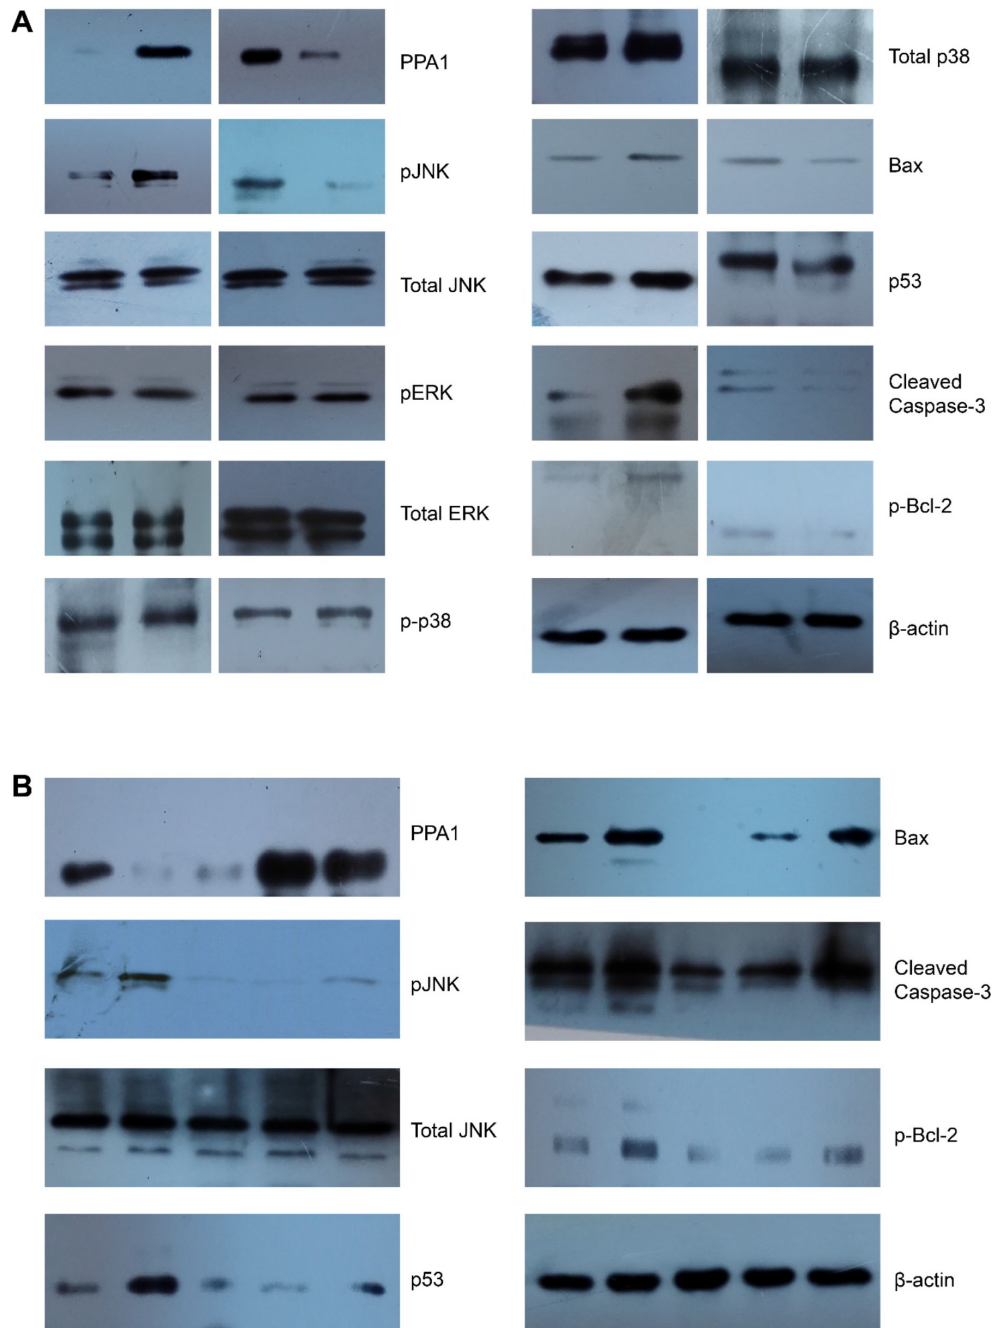

Supplementary Figure 1: (A) Original Western Blot images showed in Figure 3B. (B) Original Western Blot images showed in Figure 6B.

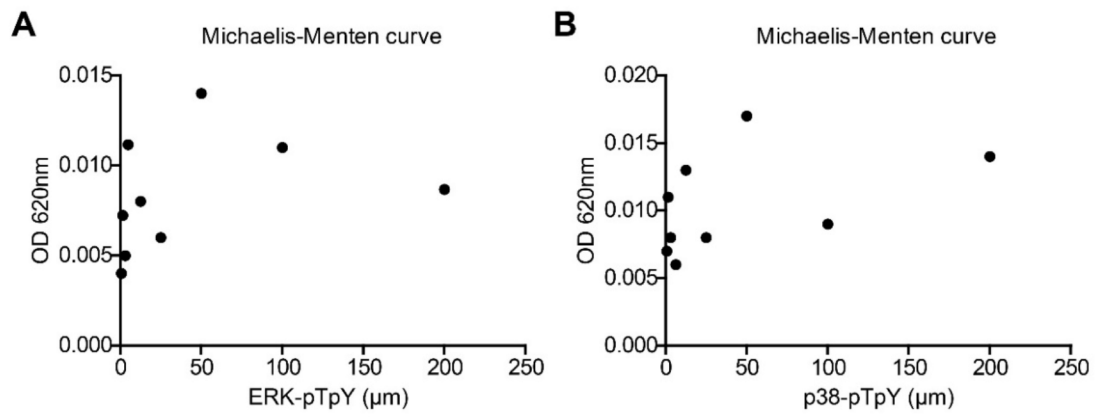

**Supplementary Figure 2: Enzymatic analysis of PPA1 to pERK and p-p38 phosphor-peptides.** PPA1-WT showed no catalytic activity towards pERK (A) or p-p38 (B) phosphor-peptides (reaction time was 10min).
